# Supplementary material for: Cetacean Intracytoplasmic Eosinophilic Globules: A Cytomorphological, Histological, Histochemical, Immunohistochemical, and Proteomic Characterization
Source: MDPI journal article supplement (doi:10.3390/ani13132130), 2023-06-27
Supplement: s1 [file s1]

**Table S1.** Biologic, epidemiologic and pathologic data of 115 cetaceans stranded in the Canary Islands included in this study.

| No | Species                       | Sex    | Age      | Nutritional status | Stranding | Main pathologic findings / Cause of death | IGE (H&E) | PAS-d | A1AT | FB | ALB | CON G | PP |
|----|-------------------------------|--------|----------|--------------------|-----------|-------------------------------------------|-----------|-------|------|----|-----|-------|----|
| 1  | <i>Delphinus delphis</i>      | ND     | ND       | ND                 | Dead      | Infectious meningoencephalitis            | +         | +     | +    | +  | +   | +     | +  |
| 2  | <i>Physeter macrocephalus</i> | Female | ND       | ND                 | Dead      | Multisystemic parasitosis                 | +         | +     | +    | +  | ND  | +     | +  |
| 3  | <i>Physeter macrocephalus</i> | Male   | Newborn  | ND                 | Dead      | Neonatal weakness                         | +         | +     | +    | +  | ND  | +     | +  |
| 4  | <i>Grampus griseus</i>        | ND     | ND       | ND                 | Dead      | ND                                        | +         | +     | -    | +  | ND  | +     | +  |
| 5  | <i>Lagenodelphis hosei</i>    | ND     | ND       | ND                 | Dead      | Nephritis                                 | +         | +     | -    | +  | ND  | -     | +  |
| 6  | <i>Delphinus delphis</i>      | ND     | ND       | ND                 | Dead      | Infectious meningoencephalitis            | -         | -     | -    | -  | -   | -     | -  |
| 7  | <i>Delphinus delphis</i>      | ND     | ND       | ND                 | Dead      | Senile                                    | +         | +     | -    | +  | ND  | -     | +  |
| 8  | <i>Ziphius cavirostris</i>    | Female | Subadult | ND                 | Alive     | Trauma                                    | +         | +     | +    | +  | ND  | +     | -  |
| 9  | <i>Stenella frontalis</i>     | Male   | Adult    | ND                 | Dead      | ND                                        | +         | -     | -    | +  | +   | +     | +  |
| 10 | <i>Stenella coeruleoalba</i>  | Hembra | Adult    | ND                 | Dead      | ND                                        | -         | -     | -    | -  | -   | -     | -  |
| 11 | <i>Delphinus delphis</i>      | Male   | Adult    | ND                 | Alive     | Cerebral hemorrhage                       | +         | +     | +    | +  | +   | +     | +  |
| 12 | <i>Delphinus delphis</i>      | Male   | ND       | ND                 | Alive     | Cerebral hemorrhage                       | +         | +     | +    | +  | ND  | +     | +  |
| 13 | <i>Delphinus delphis</i>      | Female | Cub      | ND                 | Alive     | Cerebral hemorrhage                       | +         | +     | +    | +  | +   | +     | +  |
| 14 | <i>Pseudorca crassidens</i>   | Male   | Adult    | ND                 | Alive     | Infectious meningoencephalitis            | +         | -     | -    | +  | +   | +     | +  |
| 15 | <i>Delphinus delphis</i>      | Female | Adult    | Poor               | Alive     | Infectious meningoencephalitis            | +         | +     | -    | +  | +   | +     | -  |
| 16 | <i>Stenella frontalis</i>     | Male   | Adult    | Good               | Alive     | ND                                        | +         | +     | +    | +  | +   | +     | +  |
| 17 | <i>Delphinus delphis</i>      | Female | Adult    | Poor               | Dead      | ND                                        | +         | +     | -    | +  | +   | +     | +  |
| 18 | <i>Delphinus delphis</i>      | ND     | ND       | ND                 | Dead      | ND                                        | +         | +     | -    | +  | ND  | +     | +  |
| 19 | <i>Stenella frontalis</i>     | Female | ND       | ND                 | Dead      | Bronchopneumonia                          | +         | -     | -    | +  | ND  | +     | +  |
| 20 | <i>Stenella coeruleoalba</i>  | Male   | Adult    | Poor               | Dead      | Infectious meningoencephalitis            | +         | +     | +    | +  | +   | +     | +  |
| 21 | <i>Stenella coeruleoalba</i>  | Hembra | Juvenil  | ND                 | Alive     | Infectious meningoencephalitis            | -         | -     | -    | -  | -   | +     | -  |
| 22 | <i>Stenella coeruleoalba</i>  | Male   | Juvenil  | ND                 | Dead      | Infectious meningoencephalitis            | +         | -     | -    | +  | ND  | +     | +  |
| 23 | <i>Tursiops truncatus</i>     | Female | Adult    | Good               | Dead      | Trauma                                    | +         | +     | -    | +  | +   | +     | +  |
| 24 | <i>Tursiops truncatus</i>     | Female | Adult    | Poor               | Dead      | Infectious myocarditis                    | +         | +     | -    | +  | +   | +     | +  |
| 25 | <i>Stenella frontalis</i>     | Macho  | Adult    | ND                 | Dead      | Infectious adrenalitis                    | -         | -     | -    | -  | -   | +     | -  |
| 26 | <i>Tursiops truncatus</i>     | Female | ND       | ND                 | Dead      | Infectious meningoencephalitis            | +         | +     | +    | +  | +   | +     | +  |
| 27 | <i>Stenella frontalis</i>     | Female | Cub      | Moderate           | Alive     | ND                                        | +         | +     | +    | +  | +   | +     | +  |
| 28 | <i>Tursiops truncatus</i>     | Female | Adult    | Poor               | Alive     | Parasitic sinusitis                       | +         | +     | +    | +  | +   | +     | +  |
| 29 | <i>Delphinus delphis</i>      | Female | Adult    | ND                 | Dead      | Infectious meningoencephalitis            | +         | +     | +    | +  | +   | +     | +  |
| 30 | <i>Pseudorca crassidens</i>   | Male   | Newborn  | ND                 | Dead      | Neonatal weakness                         | +         | +     | +    | +  | +   | +     | +  |
| 31 | <i>Kogia breviceps</i>        | Male   | ND       | ND                 | Dead      | Senile                                    | +         | +     | +    | +  | +   | +     | +  |
| 32 | <i>Stenella coeruleoalba</i>  | Female | ND       | ND                 | Dead      | Infectious meningoencephalitis            | +         | +     | +    | +  | +   | +     | +  |
| 33 | <i>Physeter macrocephalus</i> | Hembra | Cub      | Poor               | Dead      | Maternal separation                       | -         | -     | -    | -  | -   | -     | -  |
| 34 | <i>Tursiops truncatus</i>     | Male   | ND       | Poor               | Alive     | Parasitic meningoencephalitis             | +         | +     | +    | +  | ND  | -     | +  |
| 35 | <i>Delphinus delphis</i>      | Macho  | Adult    | Poor               | Alive     | Sepsis                                    | -         | -     | -    | -  | -   | +     | -  |
| 36 | <i>Kogia breviceps</i>        | Macho  | Adult    | Poor               | Dead      | Trauma                                    | -         | -     | -    | -  | -   | -     | -  |
| 37 | <i>Stenella frontalis</i>     | Female | Juvenil  | Good               | Alive     | Septicemia                                | +         | +     | +    | +  | +   | +     | +  |
| 38 | <i>Stenella frontalis</i>     | Female | ND       | Poor               | Dead      | B-cell lymphoma                           | +         | +     | +    | +  | ND  | +     | +  |

|    |                                   |        |          |      |       |                                                                |   |   |   |   |    |   |   |
|----|-----------------------------------|--------|----------|------|-------|----------------------------------------------------------------|---|---|---|---|----|---|---|
| 39 | <i>Stenella coeruleoalba</i>      | Male   | ND       | Poor | Alive | Corynebacterium spp. bronchopneumonia;<br>Systemic parasitosis | + | + | - | + | +  | + | + |
| 40 | <i>Stenella coeruleoalba</i>      | Male   | ND       | Poor | Alive | Infectious encephalitis; Protozoal<br>dermatitis; Senile       | + | - | - | + | +  | + | + |
| 41 | <i>Steno bredanensis</i>          | Male   | Adult    | Poor | Dead  | Infectious meningoencephalitis; Systemic<br>parasitosis        | + | + | + | + | +  | + | + |
| 42 | <i>Stenella frontalis</i>         | Male   | Juvenil  | Good | Dead  | By-caught                                                      | + | + | + | + | +  | + | + |
| 43 | <i>Delphinus delphis</i>          | Male   | Adult    | Good | Alive | T-cell lymphoma                                                | + | + | + | + | +  | + | + |
| 44 | <i>Ziphius cavirostris</i>        | Hembra | SubAdult | Poor | Dead  | Foreign body obstruction                                       | - | - | - | - | -  | - | - |
| 45 | <i>Balaenoptera physalus</i>      | Female | Newborn  | Poor | Alive | Fetal distress; Maternal-filial separation                     | + | - | - | + | +  | - | + |
| 46 | <i>Tursiops truncatus</i>         | Male   | Adult    | Poor | Dead  | Systemic herpesvirosis                                         | + | - | - | + | +  | + | + |
| 47 | <i>Delphinus delphis</i>          | Hembra | Juvenil  | Poor | Dead  | Systemic parasitosis                                           | + | - | - | - | -  | + | + |
| 48 | <i>Delphinus delphis</i>          | Macho  | Cub      | Good | Dead  | Trauma (fishing activity)                                      | + | - | - | - | -  | + | + |
| 49 | <i>Stenella frontalis</i>         | Male   | Adult    | Poor | Alive | Systemic streptococcosis                                       | + | + | + | + | +  | + | + |
| 50 | <i>Globicephala macrorhynchus</i> | Macho  | Cub      | Poor | Dead  | Maternal-filial separation                                     | - | - | - | - | -  | + | - |
| 51 | <i>Mesoplodon europaeus</i>       | Female | Newborn  | Poor | Alive | Fetal distress; Maternal-filial separation                     | + | - | - | + | -  | + | + |
| 52 | <i>Stenella coeruleoalba</i>      | Female | Adult    | Good | Dead  | Infectious pleuritis; Sepsis                                   | + | + | + | + | +  | + | + |
| 53 | <i>Tursiops truncatus</i>         | Male   | Cub      | Good | Alive | ND                                                             | + | + | - | + | +  | + | + |
| 54 | <i>Tursiops truncatus</i>         | Female | Adult    | Good | Alive | ND                                                             | + | + | - | + | +  | + | + |
| 55 | <i>Stenella frontalis</i>         | Macho  | Adult    | Poor | Alive | Systemic salmonellosis                                         | - | - | - | - | -  | - | - |
| 56 | <i>Stenella coeruleoalba</i>      | Male   | Adult    | Good | Dead  | Nocardia farcinica systemic infection                          | + | + | + | + | +  | + | + |
| 57 | <i>Stenella coeruleoalba</i>      | Male   | Adult    | Poor | Dead  | Systemic parasitosis                                           | + | + | - | + | -  | + | + |
| 58 | <i>Stenella coeruleoalba</i>      | Macho  | Juvenil  | Poor | Alive | By-caught                                                      | - | - | - | - | -  | - | - |
| 59 | <i>Delphinus delphis</i>          | Hembra | Adult    | Poor | Dead  | Systemic salmonellosis                                         | - | - | - | - | -  | - | - |
| 60 | <i>Stenella frontalis</i>         | Female | Juvenil  | Poor | Dead  | Systemic parasitosis                                           | + | + | + | + | +  | + | + |
| 61 | <i>Stenella coeruleoalba</i>      | Male   | Adult    | Good | Dead  | Infectious meningoencephalitis                                 | + | + | + | + | +  | + | + |
| 62 | <i>Stenella frontalis</i>         | Male   | Cub      | Poor | Dead  | Maternal-filial separation                                     | + | + | + | + | +  | + | + |
| 63 | <i>Tursiops truncatus</i>         | Male   | SubAdult | Good | Dead  | By-caught; Parasitic meningoencephalitis                       | + | + | + | + | +  | + | + |
| 64 | <i>Stenella coeruleoalba</i>      | Male   | Adult    | Good | Alive | Senile; Systemic parasitosis                                   | + | + | + | + | +  | + | + |
| 65 | <i>Tursiops truncatus</i>         | Female | SubAdult | Good | Dead  | By-caught; Parasitic bronchopneumonia                          | + | + | - | + | +  | + | + |
| 66 | <i>Kogia breviceps</i>            | Male   | Adult    | Good | Dead  | Congestive heart failure                                       | + | + | - | + | +  | + | + |
| 67 | <i>Stenella frontalis</i>         | Female | Adult    | Poor | Alive | Otic nasitremiasis                                             | + | + | - | + | ND | + | + |
| 68 | <i>Stenella coeruleoalba</i>      | Male   | Juvenil  | Good | Alive | Infectious meningoencephalitis                                 | + | + | + | + | +  | + | + |
| 69 | <i>Stenella coeruleoalba</i>      | Female | Adult    | Good | Alive | Infectious meningoencephalitis                                 | + | + | + | + | -  | + | + |
| 70 | <i>Stenella coeruleoalba</i>      | Male   | Adult    | Good | Alive | Infectious meningoencephalitis; Senile                         | + | + | - | + | +  | + | + |
| 71 | <i>Stenella coeruleoalba</i>      | Male   | Adult    | Good | Alive | Congestive heart failure                                       | + | + | + | + | +  | + | + |
| 72 | <i>Delphinus delphis</i>          | Male   | Cub      | Good | Alive | Systemic parasitosis                                           | + | + | + | + | +  | + | + |
| 73 | <i>Kogia sima</i>                 | Male   | Juvenil  | Good | Dead  | ND                                                             | + | + | + | + | +  | + | + |
| 74 | <i>Mesoplodon densirostris</i>    | Female | Adult    | Poor | Alive | Senile                                                         | + | - | - | + | +  | + | - |
| 75 | <i>Stenella frontalis</i>         | Female | Adult    | Good | Alive | Chronic renal disease                                          | + | - | - | + | +  | + | + |
| 76 | <i>Stenella frontalis</i>         | Female | Adult    | Good | Dead  | ND                                                             | + | + | + | + | -  | + | + |

|     |                                   |        |          |      |       |                                                                                              |   |   |   |   |    |   |   |
|-----|-----------------------------------|--------|----------|------|-------|----------------------------------------------------------------------------------------------|---|---|---|---|----|---|---|
| 77  | <i>Stenella coeruleoalba</i>      | Male   | Adult    | Good | Dead  | Otic nasitreemiasis                                                                          | + | + | + | + | ND | + | + |
| 78  | <i>Stenella frontalis</i>         | Male   | Adult    | Poor | Dead  | Otic nasitreemiasis                                                                          | + | + | + | + | +  | + | + |
| 79  | <i>Mesoplodon densirostris</i>    | Male   | Adult    | Poor | Alive | Senile                                                                                       | + | + | + | + | +  | + | + |
| 80  | <i>Stenella coeruleoalba</i>      | Male   | Juvenil  | Poor | Dead  | Infectious meningoencephalitis; Foreign body obstruction                                     | + | + | - | + | +  | + | + |
| 81  | <i>Stenella coeruleoalba</i>      | Male   | Adult    | Good | Dead  | Infectious meningoencephalitis                                                               | + | + | + | + | +  | + | - |
| 82  | <i>Delphinus delphis</i>          | Male   | Adult    | Poor | Dead  | Senile                                                                                       | + | - | - | + | +  | + | + |
| 83  | <i>Mesoplodon europaeus</i>       | Hembra | Juvenil  | Poor | Dead  | Trauma (fishing interaction)                                                                 | - | - | - | - | -  | - | - |
| 84  | <i>Stenella coeruleoalba</i>      | Female | Juvenil  | Good | Alive | Infectious meningoencephalitis                                                               | + | - | - | + | +  | - | + |
| 85  | <i>Stenella frontalis</i>         | Female | Adult    | Good | Alive | Sepsis                                                                                       | + | - | - | + | +  | + | + |
| 86  | <i>Stenella coeruleoalba</i>      | Male   | Adult    | Good | Alive | Otic nasitreemiasis                                                                          | + | + | + | + | +  | + | + |
| 87  | <i>Steno bredanensis</i>          | Male   | Juvenil  | Poor | Alive | Systemic parasitosis                                                                         | + | - | - | + | +  | + | + |
| 88  | <i>Stenella longirostris</i>      | Macho  | Juvenil  | Good | Dead  | Behavioral pathology (social cohesion)                                                       | - | - | - | - | -  | + | - |
| 89  | <i>Stenella longirostris</i>      | Macho  | Juvenil  | Good | Dead  | Behavioral pathology (social cohesion)                                                       | - | - | - | - | -  | + | - |
| 90  | <i>Stenella longirostris</i>      | Macho  | Adult    | Poor | Alive | Severa cachexia. Severe generalized dermatitis                                               | - | - | - | - | -  | + | - |
| 91  | <i>Stenella coeruleoalba</i>      | Male   | Juvenil  | Good | Dead  | Sepsis                                                                                       | + | + | + | + | +  | + | + |
| 92  | <i>Stenella coeruleoalba</i>      | Female | Adult    | Good | Dead  | Trauma                                                                                       | + | - | + | + | +  | + | + |
| 93  | <i>Stenella coeruleoalba</i>      | Female | Adult    | Good | Dead  | Infectious meningoencephalitis; spontaneous pleural rupture                                  | + | + | + | + | +  | + | + |
| 94  | <i>Stenella frontalis</i>         | Macho  | Adult    | Good | Dead  | Trauma (fishing interaction)                                                                 | - | - | - | - | -  | - | - |
| 95  | <i>Tursiops truncatus</i>         | Female | SubAdult | Good | Alive | Infectious encephalitis; Otic nasitreemiasis                                                 | + | + | + | + | +  | + | + |
| 96  | <i>Stenella coeruleoalba</i>      | Macho  | SubAdult | Poor | Dead  | Infectious meningoencephalitis                                                               | - | - | - | - | -  | - | - |
| 97  | <i>Mesoplodon europaeus</i>       | Female | SubAdult | Good | Alive | Trauma                                                                                       | + | - | - | + | +  | + | + |
| 98  | <i>Globicephala macrorhynchus</i> | Female | Adult    | Poor | Alive | Trauma (vessel collision)                                                                    | + | + | - | + | +  | + | + |
| 99  | <i>Kogia breviceps</i>            | Hembra | Adult    | Poor | Dead  | Systemic parasitosis; Senile                                                                 | - | - | - | - | -  | - | - |
| 100 | <i>Phocoena phocoena</i>          | Macho  | Newborn  | Poor | Dead  | Neonatal suffering (meconium aspiration)                                                     | - | - | - | - | -  | + | - |
| 101 | <i>Globicephala macrorhynchus</i> | Male   | Cub      | Good | Alive | Infectious meningoencephalitis and hepatitis                                                 | + | + | + | + | +  | + | + |
| 102 | <i>Stenella frontalis</i>         | Female | Adult    | Good | Alive | Infectious meningoencephalitis and myocarditis; Systemic parasitosis                         | + | + | + | + | +  | + | + |
| 103 | <i>Stenella coeruleoalba</i>      | Male   | Adult    | Poor | Alive | Infectious encephalitis and adrenalitis; Systemic parasitosis                                | + | + | - | + | -  | + | + |
| 104 | <i>Stenella frontalis</i>         | Female | Adult    | Good | Dead  | Trauma (fishing interaction); Infectious meningoencephalitis and polyomyelitis               | + | + | - | + | +  | + | + |
| 105 | <i>Delphinus delphis</i>          | Female | Adult    | Poor | Alive | Viral (CeMV) and bacterial ( <i>Streptococcus phocae</i> ) coinfection; Systemic parasitosis | + | + | + | + | +  | + | + |
| 106 | <i>Stenella coeruleoalba</i>      | Male   | Adult    | Poor | Dead  | Trauma                                                                                       | + | + | - | + | ND | + | + |
| 107 | <i>Stenella coeruleoalba</i>      | Male   | SubAdult | Poor | Dead  | Infectious encephalitis, bronchopneumonia and adrenalitis                                    | + | + | - | + | +  | + | + |
| 108 | <i>Stenella frontalis</i>         | Female | Adult    | Poor | Dead  | Primary uterine lymphoma with metastasis                                                     | + | + | - | + | ND | + | + |

|     |                               |        |          |          |       |                                                                               |   |   |   |   |   |   |   |
|-----|-------------------------------|--------|----------|----------|-------|-------------------------------------------------------------------------------|---|---|---|---|---|---|---|
| 109 | <i>Stenella coeruleoalba</i>  | Male   | Adult    | Poor     | Dead  | Infectious cholangiohepatitis and bronchopneumonia; Systemic parasitosis      | + | - | - | + | + | + | - |
| 110 | <i>Stenella coeruleoalba</i>  | Male   | Cub      | Good     | Alive | Fungal meningoencephalitis                                                    | + | + | + | + | + | + | + |
| 111 | <i>Pseudorca crassidens</i>   | Male   | Juvenil  | Poor     | Alive | Trauma                                                                        | + | - | - | + | + | - | + |
| 112 | <i>Grampus griseus</i>        | Male   | Juvenil  | Poor     | Alive | Infectious meningoencephalitis                                                | + | - | - | + | + | + | + |
| 113 | <i>Tursiops truncatus</i>     | Female | SubAdult | Moderate | Dead  | Infectious meningitis, myocarditis and bronchopneumonia; Systemic parasitosis | + | + | - | + | + | + | + |
| 114 | <i>Kogia breviceps</i>        | Male   | Adult    | Poor     | Dead  | Trauma                                                                        | + | + | + | + | + | + | + |
| 115 | <i>Physeter macrocephalus</i> | Hembra | Newborn  | ND       | Alive | Prematurity (dystocia, presumed; neonatal distress)                           | + | - | - | - | - | + | + |

ND, not determined; IGE, intracytoplasmic eosinophilic globule (H&E); PAS-d, periodic acid Schiff – diastase; A1AT,  $\alpha$ 1-antitrypsin; FB, fibrinogen; ALB, albumin; CONG, hepatic congestion; PP, “pink point.”

**Table S2.** Histochemical and immunohistochemical analysis of intracytoplasmic eosinophilic globules (IEGs) included in this study.

| Species with IEGs                 | No cases  | PAS-diacetate resistance | $\alpha$ 1-antitrypsine | Fibrinogen   | Albumin      | Pink points  |
|-----------------------------------|-----------|--------------------------|-------------------------|--------------|--------------|--------------|
| <i>Balaenoptera physalus</i>      | 1         | 0/1                      | 0/1                     | 1/1          | 1/1          | 1/1          |
| <i>Delphinus delphis</i>          | 15        | 12/15                    | 8/15                    | 13/15        | 10/15        | 14/15        |
| <i>Globicephala macrorhynchus</i> | 2         | 2/2                      | 1/2                     | 2/2          | 2/2          | 2/2          |
| <i>Grampus griseus</i>            | 2         | 1/2                      | 0/0                     | 2/2          | 1/1          | 2/2          |
| <i>Kogia breviceps</i>            | 3         | 3/3                      | 2/3                     | 3/3          | 3/3          | 3/3          |
| <i>Kogia simus</i>                | 1         | 1/1                      | 1/1                     | 1/1          | 1/1          | 1/1          |
| <i>Lagenodelphis hosei</i>        | 1         | 1/1                      | 0/1                     | 1/1          | NI           | 1/1          |
| <i>Mesoplodon densirostris</i>    | 2         | 1/2                      | 1/2                     | 2/2          | 2/2          | 2/2          |
| <i>Mesoplodon europaeus</i>       | 2         | 0/0                      | 0/2                     | 2/2          | 1/2          | 2/2          |
| <i>Physeter macrocephalus</i>     | 3         | 2/3                      | 2/3                     | 2/3          | 0/2          | 3/3          |
| <i>Pseudorca crassidens</i>       | 3         | 1/3                      | 1/3                     | 3/3          | 3/3          | 3/3          |
| <i>Stenella coeruleoalba</i>      | 27        | 22/27                    | 16/27                   | 27/27        | 21/24        | 25/27        |
| <i>Stenella frontalis</i>         | 18        | 14/18                    | 11/18                   | 18/18        | 13/14        | 18/18        |
| <i>Steno bredanensis</i>          | 2         | 1/2                      | 1/2                     | 2/2          | 2/2          | 2/2          |
| <i>Tursiops truncatus</i>         | 12        | 11/12                    | 5/12                    | 12/12        | 11/11        | 12/12        |
| <i>Ziphius cavirostris</i>        | 1         | 0/1                      | 1/1                     | 1/1          | 0/1          | 0/1          |
| <b>Total</b>                      | <b>95</b> | <b>72/95</b>             | <b>50/95</b>            | <b>92/95</b> | <b>71/84</b> | <b>91/95</b> |

NI, not identified

**Table S3.** Quantitative assessment of lectin-histochemistry labeling pattern, mild +, moderate ++, marked +++.

| Lectin       | Labeling pattern                               |                                                             |                                    |
|--------------|------------------------------------------------|-------------------------------------------------------------|------------------------------------|
|              | I415/05                                        | I262/06                                                     | I150/04                            |
| <b>WGA</b>   | ++ granular cytoplasmic labeling               | + granular cytoplasmic labeling                             | + granular cytoplasmic labeling    |
| <b>SNA</b>   | ++ globular labeling; +++ canalicular labeling | +++ globular labeling; +++ canalicular and diffuse labeling | +++ canalicular labeling           |
| <b>GNA</b>   | +++ canalicular labeling                       | +++ diffuse pattern                                         | ++ canalicular and diffuse pattern |
| <b>PHA-E</b> | + globular labeling                            | +++ globule labeling                                        | +++ sinusoidal surface labeling    |
| <b>PHA-L</b> | + Kupffer cell labeling                        | ++ Kupffer cell labeling                                    | ++ + Kupffer cell labeling         |
| <b>DSA</b>   | +++ canalicular labeling                       | ++ diffuse labeling                                         | ++ canalicular labeling            |

SNA, *Sambucus nigra* lectin (recognition point: NeuAc $\alpha$ 2,6Gal- o NeuAc $\alpha$ 2,6GalNAc-); PHA-E, *Phaseolus vulgaris* Erythroagglutinin (recognition point: Bisecting GlcNAc); WGA, Wheat Germ Agglutinin (recognition point: N-acetylglucosamine (GlcNAc) and sialic acid); PHA-L, *Phaseolus vulgaris* Leucoagglutinin (recognition point: Gal $\beta$ 1,4GlcNAc $\beta$ 1,6(Gal $\beta$ 1,4GlcNAc $\beta$ 1,2) Man $\alpha$ -), DSL, *Datura stramonium* lectin (recognition point: ( $\alpha$ -1,4) linked N-acetylglucosamine(GlcNAc)); GNA, *Galanthus nivalis* agglutinin (recognition point: Man $\alpha$ 1,2Man- Man $\alpha$ 1,6Man- Man $\alpha$ 1,3Man-).

**Table S4.** Peptide Mass Fingerprint (PMF) results.

| Band | Protein                                                                   | Confidence (Database)           |
|------|---------------------------------------------------------------------------|---------------------------------|
| 1    | Serum albumin                                                             | CI >90% (SwissProt)             |
| 2    | Protein disulfide-isomerase (prolyl 4-hydroxylase, beta subunit)          | CI >99% (SwissProt; nrNCBI)     |
|      | Catalase                                                                  | CI >99% (SwissProt; nrNCBI)     |
| 3    | Protein disulfide isomerase-associated 3 (glucose regulated protein 58kD) | CI >99% (SwissProt; nrNCBI)     |
| 4    | Calreticulin                                                              | CI >99% (SwissProt; nrNCBI)     |
|      | Various Aldehyde dehydrogenase, mitochondrial protein-related peptides    | No statistical significance     |
| 5    | Carbamoyl-phosphate synthetase 1, mitochondrial isoform 12                | score 147, 100% (SwissProt, #7) |
|      | Possible Integrin alpha-11                                                | No statistical significance     |
| 6    | carbamoyl-phosphate synthetase 1, mitochondrial isoform 33 ,              | score 95, >99.9%                |

|    |                                                                                                              |                                                                               |
|----|--------------------------------------------------------------------------------------------------------------|-------------------------------------------------------------------------------|
| 7  | Endoplasmin / HSP90 / tumor rejection antigen gp96                                                           | score 98, >99%                                                                |
| 8  | formyltetrahydrofolate dehydrogenase isoform a variant (aldehyde-dehydrogenase 1 family, member L1)          | score 80, >99%                                                                |
| 9  | Endoplasmin/HSP90/tumor rejection antigen gp96<br>Traces of formyltetrahydrofolate dehydrogenase             | Score 108, >99.9% (SwissProt, #10)                                            |
| 10 | Betaine-homocysteine methyltransferase                                                                       | Score 218, 100%                                                               |
| 11 | Betaine-homocysteine methyltransferase<br>Beta-actin                                                         | Score 70, >90%<br>Score 69, >90%                                              |
| 12 | Actin                                                                                                        | Score 149, 100%                                                               |
| 13 | Alanine-glyoxylate aminotransferase/Serine--pyruvate aminotransferase, mitochondrial                         | Score 131, 100% (SwissProt)                                                   |
| 14 | Ornithine carbamoyltransferase<br>Arginase 1<br>Hepatocyte growth factor-regulated tyrosine kinase substrate | Score 190, 100%<br>Score 117, 100% (SwissProt)<br>No statistical significance |
| 15 | Ferritin L subunit                                                                                           | Score 125, 100%                                                               |
| 16 | Methionine adenosyltransferase I, alpha/S-adenosylmethionine synthetase isoform q type-1                     | Score 160, 100 %                                                              |
| 17 | Glutathione S-transferase                                                                                    | Score 95, >99 %                                                               |

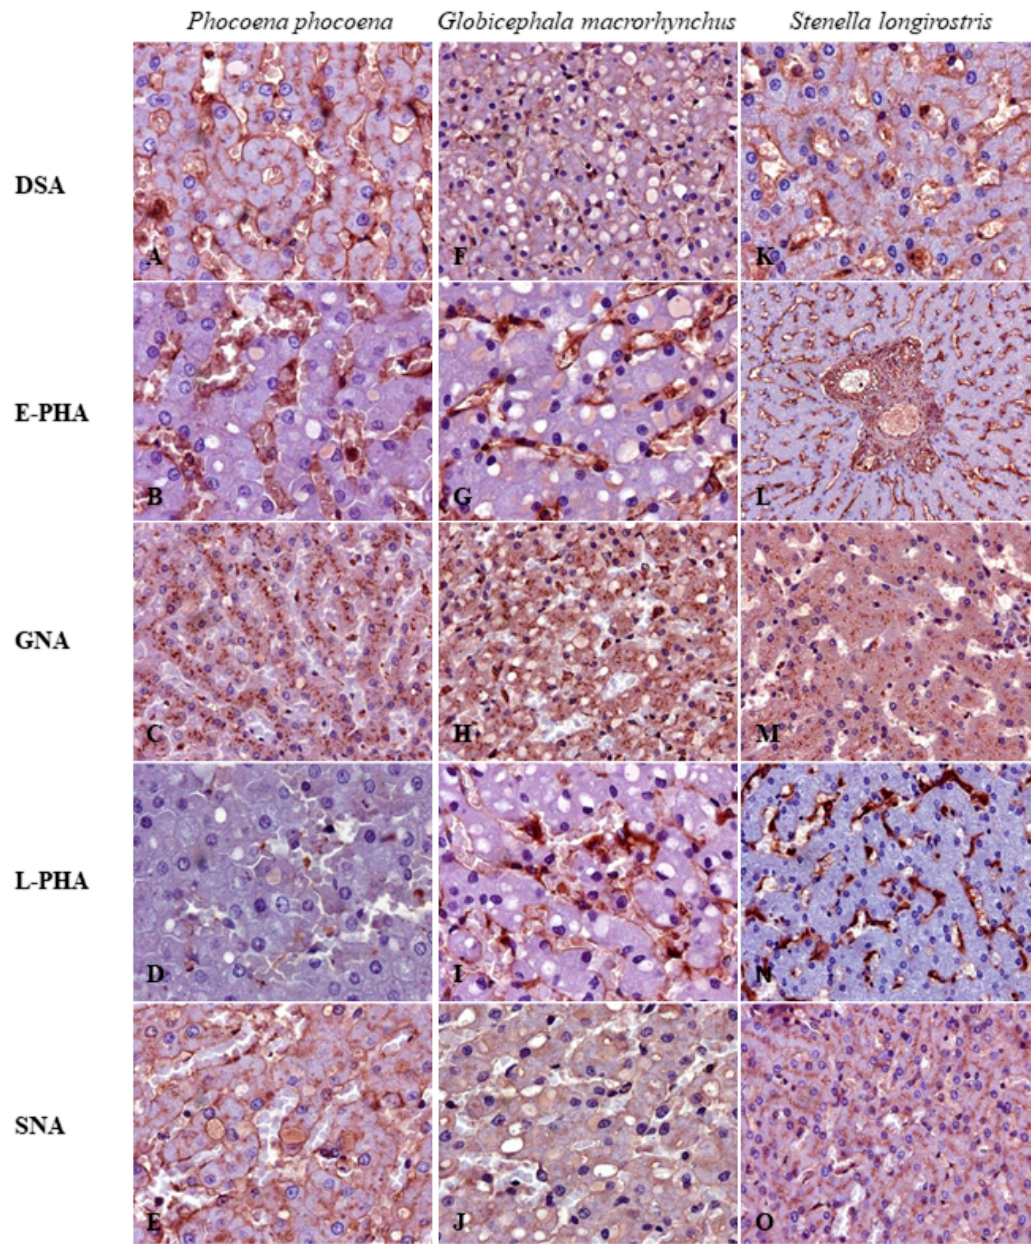

**Figure S1.** Lectin-immunohistochemical features of intracytoplasmic eosinophilic globules (IEGs) in cetaceans. SNA, Sambucus nigra lectin; PHA-E, Phaseolus vulgaris erythroagglutinin; WGA, wheat germ agglutinin; PHA-L, Phaseolus vulgaris leucoagglutinin, DSL, Datura stramonium lectin; GNA, Galanthus nivalis agglutinin. Harbor porpoise, *Phocoena phocoena*, (a) through (e). Short-finned pilot whale, *Globicephala macrorhynchus*, (f) through (j). Spinner dolphin, *Stenella longirostris*, (k) through (o). (a) Canalicular pattern. (b) Globular pattern. (c) Canalicular pattern. (d) Labeling within Kupffer cells. (e) Globular and canalicular pattern. (f) Diffuse pattern. (g) Globular pattern. (h) Diffuse pattern. (i) Labeling within Kupffer cells. (j) Globular, canalicular and diffuse patterns. (k) Canalicular pattern. (l) Labeling along sinusoidal surface. (m) Canalicular and diffuse patterns. (n) Labeling within Kupffer cells. (o) Canalicular pattern.



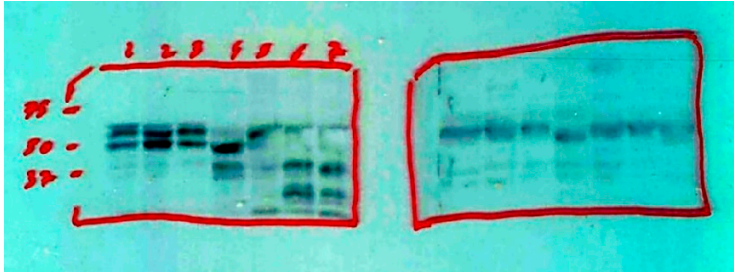

**Figure S2.** Western blot. Fibrinogen (left) and  $\alpha$ 1-antitrypsine (right).

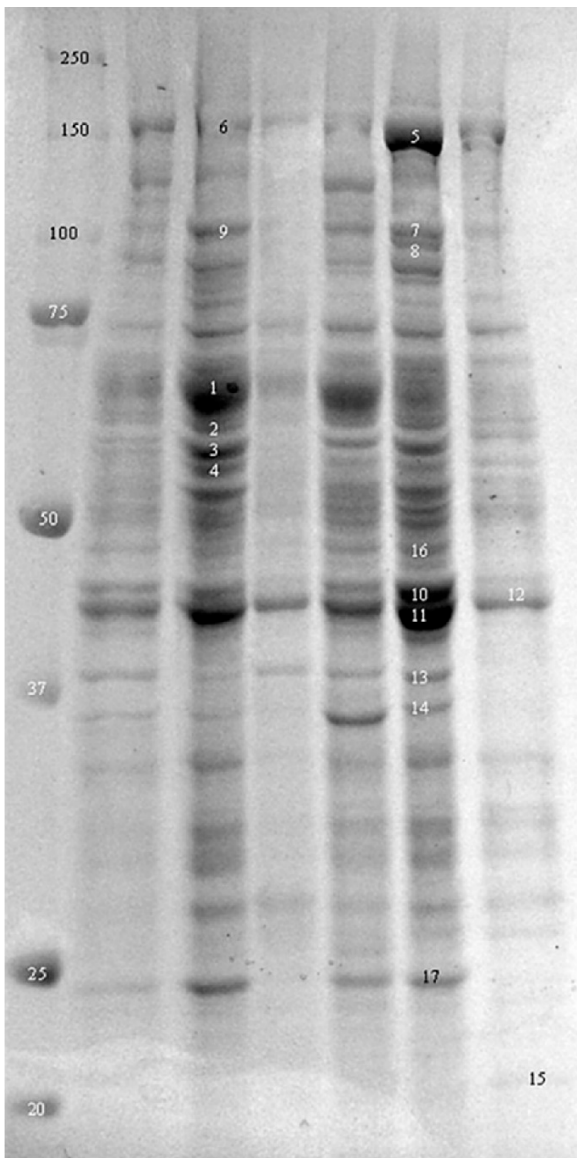

**Figure S3.** 10% acrylamide gel with markings of the 17 points from which the proteins were extracted.
